1 **Title: Relative contribution of COVID-19 vaccination and SARS-CoV-2 infection to population-level**  
2 **seroprevalence of SARS-CoV-2 spike antibodies in a large integrated health system**

3  
4 **Authors:** Tyler C. Chervo, MPH<sup>1</sup>; Eric P. Elkin, MPH<sup>1</sup>; Joshua R. Nugent, PhD<sup>1</sup>; Emily Valice, MPH<sup>1</sup>; Laura B.  
5 Amsden, MSW, MPH<sup>1</sup>; Isaac J. Ergas, PhD, MPH, MFA<sup>1</sup>; Julie R. Munneke, BA<sup>1</sup>; Monica Flores<sup>1</sup>; Gina N.  
6 Saelee<sup>1</sup>; Crystal A. Hsiao, MPH<sup>1</sup>; Jeffery M. Schapiro, MD<sup>2</sup>; Charles P. Quesenberry, PhD<sup>1</sup>; Douglas A.  
7 Corley, MD, PhD<sup>1,2</sup>; Laurel A. Habel, PhD<sup>1</sup>; Lawrence H. Kushi, ScD<sup>1</sup>; Jacek Skarbinski, MD<sup>1,2,3,4</sup>

8  
9 **Affiliations:**

- 10 1. Division of Research, Kaiser Permanente Northern California, Oakland, CA  
11 2. The Permanente Medical Group, Kaiser Permanente Northern California, Oakland, CA  
12 3. Department of Infectious Diseases, Oakland Medical Center, Kaiser Permanente Northern California,  
13 Oakland, CA  
14 4. Physician Researcher Program, Kaiser Permanente Northern California, Oakland, CA

15  
16 **Keywords:** SARS-CoV-2, seroprevalence, COVID-19 vaccination

17  
18 **Word count:** Abstract (242); Manuscript text (3,055)

19  
20 **Corresponding author:**

21 Jacek Skarbinski  
22 Department of Infectious Diseases  
23 3600 Broadway  
24 Oakland, CA 94611  
25 Email: jacek.skarbinski@kp.org  
26 Mobile: 510-418-2196  
27 Fax: 510-752-7892

28  
29 **Article summary**

30 By April 2022, >93% of people had antibodies to SARS-CoV-2 with COVID-19 vaccination as the main  
31 driver of overall population-level seroprevalence in our healthcare system. SARS-CoV-2 infection  
32 without vaccination made a small contribution to population-level seroprevalence in our healthcare  
33 system.

34 **Abstract**

35 **Background:** Understanding the relative contributions of SARS-CoV-2 infection-induced and vaccine-  
36 induced seroprevalence is key to measuring overall population-level seroprevalence and help guide  
37 policy decisions.

38 **Methods:** Using a series of six population-based cross-sectional surveys conducted among persons aged  
39  $\geq 7$  years in a large health system with over 4.5 million members between May 2021 and April 2022, we  
40 combined data from the electronic health record (EHR), an electronic survey and SARS-CoV-2 spike  
41 antibody binding assay, to assess the relative contributions of infection and vaccination to population-  
42 level SARS-CoV-2 seroprevalence. EHR and survey data were incorporated to determine spike antibody  
43 positivity due to SARS-CoV-2 infection and COVID-19 vaccination. We used sampling and non-response  
44 weighting to create population-level estimates.

45 **Results:** We enrolled 4,319 persons over six recruitment waves. SARS-CoV-2 spike antibody  
46 seroprevalence increased from 83.3% (CI 77.0-88.9) in May 2021 to 93.5% (CI 89.5-97.5) in April 2022.  
47 By April 2022, 68.5% (CI 61.9-74.3) of the population was seropositive from COVID-19 vaccination only,  
48 13.9% (10.7-17.9) from COVID-19 vaccination and prior diagnosed SARS-CoV-2 infection, 8.2% (CI 4.5-  
49 14.5) from prior diagnosed SARS-CoV-2 infection only and 2.9% (CI 1.1-7.6) from prior undiagnosed  
50 SARS-CoV-2 infection only. We found high agreement ( $\geq 97\%$ ) between EHR and survey data for  
51 ascertaining COVID-19 vaccination and SARS-CoV-2 infection status.

52 **Conclusions:** By April 2022, 93.5% of persons had detectable SARS-CoV-2 spike antibody, predominantly  
53 from COVID-19 vaccination. In this highly vaccinated population and over 18 months into the pandemic,  
54 SARS-CoV-2 infection without COVID-19 vaccination was a small contributor to overall population-level  
55 seroprevalence.

56 **Background**

57 By the end of January 2022, the United States has recorded over 75 million cases of coronavirus  
58 disease 2019 (COVID-19) and over 900,000 deaths.<sup>1</sup> Antibodies that can neutralize severe acute  
59 respiratory syndrome coronavirus 2 (SARS-CoV-2), the virus that causes COVID-19, can be generated  
60 either through SARS-CoV-2 infection or COVID-19 vaccination. A number of studies have reported high  
61 SARS-CoV-2 seroprevalence in the United States, but few studies have provided a detailed analysis of  
62 spike antibody seropositivity after vaccination and infection, differential seropositivity by demographic  
63 and clinical factors, or documented seropositivity over time.

64 In addition, seropositivity ascertainment may be biased by misclassification, and few studies  
65 have used multiple data sources (e.g., detailed electronic health records (EHR) and patient surveys) to  
66 comprehensively assess seropositivity in the population. Some studies have focused on easily accessible  
67 subsets of the population such as blood donors or commercial laboratory samples, which may not  
68 generalize well to other populations.<sup>2-4</sup> In addition, despite numerous studies from the pre-vaccination  
69 era relatively few studies have been conducted when COVID-19 vaccines have been widely available.<sup>5</sup>

70 To address these gaps, we conducted six serial population-based cross-sectional serosurveys in a  
71 large integrated health system in California and combined data from the electronic health record (EHR)  
72 on COVID-19 vaccination and diagnosed SARS-CoV-2 infection, self-report of COVID-19 vaccination and  
73 SARS-CoV-2 infection on an electronic survey, and SARS-CoV-2 spike antibody binding assay test results  
74 to assess SARS-CoV-2 spike antibody seroprevalence over time. In addition, we examined the relative  
75 contributions of COVID-19 vaccination and SARS-CoV-2 infection to overall seroprevalence, identified  
76 demographic and clinical factors associated with seropositivity after COVID-19 vaccination or SARS-CoV-  
77 2 infection, and assessed the agreement between EHR, survey and SARS-CoV-2 spike antibody testing to  
78 ascertain COVID-19 vaccination and SARS-CoV-2 infection status.

79

80 **Methods**

81 *Setting*

82 Kaiser Permanente Northern California (KPNC) is a large, integrated healthcare system that  
83 serves >4.5 million people in northern and central California. KPNC health plan members receive almost  
84 all preventive health services, including COVID-19 vaccination, and clinical care (e.g., SARS-CoV-2  
85 diagnostic testing and treatment) within a closed network that includes 210 medical offices and 21  
86 hospitals. KPNC provides health insurance and health care services to over 30% of the population within  
87 the counties in which KPNC has a physical presence. The demographic and socioeconomic characteristics  
88 of KPNC members closely approximate the region's diverse demographics and includes patients with  
89 Medicare, Medicaid, and commercial insurance.<sup>6</sup>

90

91 *Study design, sampling, recruitment, and SARS-CoV-2 serological testing*

92 We conducted six serial population-based cross-sectional studies that combine EHR clinical data,  
93 participant self-report from an electronic survey, and SARS-CoV-2 spike antibody testing to estimate  
94 SARS-CoV-2 spike antibody seroprevalence. For each wave of data collection, we developed a sampling  
95 frame of all KPNC members aged  $\geq 7$  years with active membership status for at least two months prior  
96 to the sampling date. We excluded persons who: 1) were known to be deceased on sampling date; 2)  
97 were known to have declined contact for all future studies at KPNC; 3) were previously sampled to  
98 participate in this study; 4) had no known email address on file; 5) were aged <18 years and did not have  
99 an identified parent or guardian in the EHR.

100 Using the sampling frame above, we selected six independent samples for six recruitment waves  
101 and sampling dates: Wave 1 (May 3<sup>rd</sup> 2021), Wave 2 (May 25<sup>th</sup> 2021), Wave 3 (July 29<sup>th</sup> 2021), Wave 4  
102 (September 8<sup>th</sup> 2021), Wave 5 (October 12<sup>th</sup> 2021), Wave 6 (December 20<sup>th</sup> 2021). For each wave, we  
103 sampled 11,370 eligible persons using stratified random sampling with strata defined as age group in

104 years (7-17, 18-44, 45-64, 65+) and race/ethnicity (white, Latinx/Hispanic, Asian, Black, other)  
105 combinations with selection probability proportional-to-size in all strata except Black persons. We  
106 oversampled Black persons in all age group strata three-fold to increase the sample size for this  
107 population. All activities involving human subjects were reviewed and ethically approved by the KPNC  
108 Institutional Review Board.

109 All sampled persons received up to three recruitment emails inviting them to participate in the  
110 survey. Persons who agreed to participate completed an electronic survey on demographics, COVID-19  
111 prevention measures, self-reported vaccination status, and prior SARS-CoV-2 testing and infection. All  
112 persons who agreed to participate had a blood sample drawn for SARS-CoV-2 antibody testing at their  
113 local KPNC facility. Serology assays were conducted at our regional laboratory using the Diasorin Liaison  
114 SARS-CoV-2 S1/S2 IgG test which has been found to have a specificity of 98.9% and a sensitivity of  
115 96.2%.<sup>7,8</sup> This assay is used clinically in the KPNC health system, which provides a binary  
116 (positive/negative) result for the presence of SARS-CoV-2 spike binding antibody. Blood draws for each  
117 wave occurred during the following time periods: Wave 1 (May 2021 – August 2021; median May 5,  
118 2021), Wave 2 (June 2021 – September 2021; median June 26, 2021), Wave 3 (August 2021 – February  
119 2022; median August 27, 2021), Wave 4 (September 2021 – January 2022; median September 28, 2021),  
120 Wave 5 (October 2021 – February 2022; median October 30, 2021), and Wave 6 (January 2022 – April  
121 2022; median January 24, 2022).

122

### 123 *Objectives and variable definitions*

124 The primary objective was to estimate the prevalence of anti-SARS-CoV-2 spike binding antibody  
125 seropositivity and assess the relative contributions of COVID-19 vaccination, diagnosed SARS-CoV-2  
126 infection, and undiagnosed SARS-COV-2 infection to overall population-level seroprevalence in our  
127 healthcare system. Diagnosed SARS-CoV-2 infection was based on having at least one of the following: a

128 positive SARS-CoV-2 nucleic acid amplification test (NAAT) or antigen test in the EHR, a COVID-19  
129 diagnosis in the EHR in absence of a positive lab result due to reporting a positive test, or self-report of  
130 COVID-19 in the survey. Undiagnosed SARS-CoV-2 infection was defined as a positive spike antibody test  
131 among participants with no COVID-19 vaccination or diagnosed SARS-CoV-2 infection. The secondary  
132 objectives were: 1) to assess factors associated with seropositivity among persons vaccinated for COVID-  
133 19; 2) identify agreement between EHR and patient reported vaccination and infection status.

134 We assessed receipt of all doses of COVID-19 vaccines (BNT162b2 [Pfizer/BioNTech], mRNA-  
135 1273 [Moderna/National Institutes of Health] or Ad.26.COV2.s [Janssen] prior to blood collection date in  
136 the EHR. Vaccination information was obtained from the EHR or from the California Immunization  
137 Registry; all vaccine providers in the state are required to report vaccine administration within 24 hours  
138 of administration. COVID-19 vaccination status was classified as: 1) Completed primary series, which  
139 includes persons who received one dose of Ad.26.COV2.s or 2 doses of BNT162b2 or m-RNA-1273; 2)  
140 Completed primary series plus an additional dose, which includes persons who completed a primary  
141 series and received at least one additional dose of any COVID-19 vaccine (Ad.26.COV2.s, BNT162b2 or m-  
142 RNA-1273); 3) Other, which includes persons who received one dose of either BNT162b2 or m-RNA-  
143 1273, another vaccine product, or an unapproved combination of vaccines; 4) unvaccinated, which  
144 includes persons who have not received any COVID-19 vaccine. COVID-19 vaccination and SARS-CoV-2  
145 infection were assessed via self-report in the survey using the question “Have you received a COVID-19  
146 vaccine?” and “Have you ever been diagnosed with COVID-19?”, respectively.

147 Other variables of interest included demographic characteristics (age, sex, race/ethnicity), body  
148 mass index, Charlson comorbidity index score<sup>9</sup> and individual Charlson comorbidities. Individual  
149 Charlson comorbidity categories were reclassified into the following: 1) atherosclerotic cardiovascular  
150 disease includes persons with prior myocardial infarction, congestive heart failure, peripheral vascular  
151 disease, and prior cerebrovascular event; 2) diabetes includes persons with diabetes with and without

152 end-organ damage; 3) cancer includes persons with solid tumor with localized or metastatic disease, or  
153 leukemia and lymphoma.

154

#### 155 *Weighting*

156 Sampling weights were calculated as the inverse of the probability of selection within a given  
157 age and race strata. We adjusted for non-response bias by calculating a response weight defined as the  
158 inverse of the probability of having completed the survey and SARS-CoV-2 spike antibody testing. This  
159 probability was calculated using the “SuperLearner” package for the R programming language<sup>10</sup>, which  
160 evaluates several candidate algorithms for model fitting and creates a weighted ensemble model from  
161 these candidate algorithms. The variables used in non-response weighting were recruitment wave, age  
162 group, sex, race/ethnicity, geographic area, Charlson comorbidity index score category, preferred  
163 language, body mass index category, COVID-19 vaccination status and prior SARS-CoV2 infection in the  
164 EHR. Non-response weights were normalized to the size of the eligible sampled population and trimmed  
165 such that the maximum trimmed weight was the 99<sup>th</sup> percentile of the untrimmed weights. The final  
166 weight used in the analysis was the product of the sampling weight and the non-response weight.

167

#### 168 *Statistical methods*

169 To estimate the prevalence of anti-SARS-CoV-2 spike antibody seropositivity in northern and  
170 central California, we calculated weighted frequencies and 95% confidence intervals (CIs). Contributions  
171 to population-level seroprevalence from prior infection, vaccination, or both were calculated as the  
172 percent of persons who tested positive for anti-SARS-CoV-2 spike antibodies and were in one of the  
173 above categories (ex. Antibody positive and has only been vaccinated). We assessed whether anti-SARS-  
174 CoV-2 seropositivity varied by levels of select demographic and clinical characteristics by performing a  
175 Chi-square test with Rao & Scott’s correction.<sup>11</sup> To assess seropositivity among persons vaccinated for

176 COVID-19, we used a modified log-Poisson regression with robust standard errors<sup>12</sup> to estimate the  
177 adjusted prevalence ratio of anti-SARS-CoV-2 antibodies by age group, sex, race/ethnicity, Charlson  
178 comorbidity index score, chronic obstructive pulmonary disease, chronic kidney disease, atherosclerotic  
179 cardiovascular disease, cancer, diabetes, body mass index category, COVID-19 vaccination doses,  
180 product and months since last vaccine dose. Concordance between EHR and survey ascertainment of  
181 COVID-19 vaccination and SARS-CoV-2 infection was assessed by calculating unadjusted percentages. All  
182 analyses were performed in R version 4.0.2.

183

## 184 **Results**

185         Of 3.5 million eligible KPNC members, we sampled 11,300 people per wave for a total of 67,800  
186 people; of these sampled persons, 67,108 were found to be eligible during recruitment and 4,319 (6.4%)  
187 persons agreed to participate and completed the electronic survey and SARS-CoV-2 spike antibody  
188 testing (Supplementary Figure 1). Significant differences between respondents and non-respondents in  
189 each wave included recruitment wave, age group, sex, race/ethnicity, geographic area, Charlson  
190 comorbidity index score category, body mass index category, COVID-19 vaccination status and prior  
191 SARS-CoV2 infection in the EHR with standardized mean differences >0.20 (Supplementary Table 1).  
192 After applying non-response weights, the standardized mean differences between respondents and  
193 non-respondents across all characteristics were <0.20 except for combination of prior COVID-19  
194 vaccination and SARS-CoV-2 infection at time of serology testing (0.28).

195         Across all six waves of data collection, 20% were aged 65+ years or older, 56% were female,  
196 6.0% Black, 19% Hispanic, and 64% had a Charlson comorbidity index score of 0 (Table 1). In all, 75% had  
197 received COVID-19 vaccination only, 7.2% had received COVID-19 vaccination and had a diagnosed  
198 SARS-CoV-2 infection, 5.0% had prior diagnosed SARS-CoV-2 infection only and 13% had no COVID-19  
199 vaccination or diagnosed SARS-CoV-2 infection. Overall, 69% had completed a primary COVID-19



200 vaccination series and 9.8% had completed a primary series and an additional dose; 45% received  
201 BNT162b2 (Pfizer/BioNTech) and 32% received mRNA-1273 (Moderna/NIH).

202           Across all six waves, 87.5% had detectable SARS-CoV-2 spike antibody, with a range of 83.3% in  
203 Wave 1 (median test date May 5, 2021) to 93.5% in Wave 6 (median test date January 24, 2022). We  
204 found differences in seroprevalence by age group (e.g., aged 7-17 years 63.3% versus aged 65+ years  
205 94.1%) and race/ethnicity (Black 80.6% versus Asian 94.3%). Seroprevalence was higher among persons  
206 who received COVID-19 vaccination only (99.0%) versus persons with prior diagnosed SARS-CoV-2  
207 infection only (88.5%). Among persons who had no prior COVID-19 vaccination or diagnosed SARS-CoV-2  
208 infection, 12.7% had detectable SARS-CoV-2 spike antibody.

209           Within our healthcare system, from May 2021 to April 2022, SARS-CoV-2 infection incidence  
210 peaked in August 2021 (during circulation of the Delta variant; B.1.617.2) and January 2022 (during  
211 circulation of the Omicron variant; B.1.1.529) (Figure 1, panel A) and the percentage of all persons in our  
212 health system who received at least one COVID-19 vaccination increased from 38% in May 2021 to  
213 70.4% in February 2022 (Figure 1, panel B). COVID-19 vaccination was the main driver of increasing  
214 seroprevalence in our healthcare system (Table 2). The contribution to population level seroprevalence  
215 by people with diagnosed SARS-CoV-2 infection increased from 8.3% in Wave 1 to 22.1% by Wave 6.  
216 Overall, only a small percentage had undiagnosed SARS-CoV-2 infection (positive spike antibody test  
217 among participants with no COVID-19 vaccination or diagnosed SARS-CoV-2 infection) (e.g., 2.9% in  
218 wave 6).

219           We assessed factors associated with detectable SARS-CoV-2 spike antibodies among persons  
220 who received a complete primary COVID-19 vaccination series with or without an additional dose and  
221 who had no prior diagnosed SARS-CoV-2 infection (Table 3). Overall, 99% had detectable SARS-CoV-2  
222 spike antibodies. Factors significantly associated with detectable SARS-CoV-2 spike antibodies among  
223 vaccinated persons were Asian race (adjusted prevalence ratio [aPR] 1.01; CI 1.00-1.01) and Black race

224 (aPR 1.01; CI 1.01-1.02) relative to White race and having completed a primary COVID-19 vaccination  
225 series plus an additional dose relative to having completed a primary series only (aPR 1.01; CI 1.00-1.02).

226 For ascertainment of COVID-19 vaccination status and prior diagnosed SARS-CoV-2 infection, the  
227 EHR and patient self-report had 99.1% agreement for COVID-19 vaccination and 97.1% for prior  
228 infection (Table 4). However, the EHR only identified 74.4% of diagnosed prior infections (sensitivity)  
229 compared to the survey using self-report as the gold standard. For ascertainment of prior SARS-CoV-2  
230 spike antigen exposure as measured by SARS-CoV-2 spike antibody testing, spike antibody test results  
231 had 98.5% agreement with EHR or patient self-report of COVID-19 vaccination or prior diagnosed  
232 infection (Table 5).

233

## 234 **Discussion**

235 In this series of six cross-sectional population-based serosurveys with linked EHR and self-  
236 reported survey data in a large integrated health system in California, we found that by the end of our  
237 sixth recruitment wave in April 2022, 93.5% of persons were seropositive for spike antibody, with prior  
238 COVID-19 vaccination only being the main contributor (68.5%), followed by diagnosed SARS-COV-2  
239 COVID-19 vaccination and diagnosed SARS-CoV-2 infection (13.9%) and diagnosed SARS-CoV-2 infection  
240 only (8.2%); undiagnosed SARS-CoV-2 infection among unvaccinated persons contributed a small  
241 proportion to population level seroprevalence (2.9%). Among persons without prior diagnosed infection  
242 who have received at least a primary COVID-19 vaccination series, 99% had detectable SARS-COV-2  
243 antibodies with minimal differences among sub-groups (e.g., 99.2% among person who received primary  
244 series only and 99.9% among person who received a primary series plus an additional dose).

245 Numerous seroprevalence studies have been conducted to date.<sup>2,13-16</sup> Similar to this study,  
246 others<sup>14,16</sup> conducted in California around the time of our study period have found high levels of  
247 seroprevalence with >90% of persons seropositive for spike antibody by early 2022 due to exposure to

248 COVID-19 vaccination or SARS-CoV-2 infection. Similarly, to other studies, we found that vaccination was  
249 the main driver of population-level seroprevalence, but that by April 2022 a substantial percentage of  
250 the population had a history of SARS-COV-2 infection (25%). Although, we did not conduct testing for  
251 SARS-CoV-2 infection with nucleocapsid antibody testing, we were able to identify a small percentage of  
252 persons who have undiagnosed SARS-CoV-2 infection among those with no recorded or self-reported  
253 SARS-CoV-2 infection or vaccination. The estimated fraction of undiagnosed infections has varied across  
254 studies, with one US population-based study from early in the pandemic finding an undiagnosed  
255 seropositivity rate of 4.6% by mid-July 2020.<sup>17</sup> Another study conducted in California June – August  
256 2020 estimated that only 31% of infections had been reported to the California Department of Public  
257 Health.<sup>13</sup> By the end of our study period, we found that the overall weighted seropositivity among  
258 persons without EHR confirmed or self-reported COVID-19 vaccination or SARS-CoV-2 infection to be  
259 12.6%, though we note that we could not identify the prevalence of undiagnosed infections among  
260 vaccinated persons. The combined changes in the availability of COVID-19 testing over time and  
261 increasing transmissibility of SARS-CoV-2 variants will change the proportion of infections that go  
262 undiagnosed over time and further studies of this type, including among vaccinated persons, are  
263 important to estimating this proportion.

264         Seroprevalence was high among most demographic groups, except for children aged 7-17 years;  
265 this likely represents lower COVID-19 vaccination rates as recommendations for COVID-19 vaccination  
266 lagged for children compared to adults. In addition, seropositivity was lower among Black Americans  
267 (80.6%) compared with Asian Americans (94.3%) suggesting racial/ethnicity disparities in COVID-19  
268 vaccination rates since vaccination is the major driver of seroprevalence in our healthcare system. Other  
269 research has shown disparities in COVID-19 vaccine uptake by race due to a variety of causes.<sup>18,19</sup>  
270 Addressing disparities in vaccine uptake among different race/ethnic groups will contribute to reducing  
271 disparities in COVID-19 morbidity and mortality.<sup>20</sup>

272 Seropositivity among persons who received COVID-19 vaccination was very high (99%) overall  
273 and minimal differences were noted by demographic or clinical characteristics. The commercially  
274 available assay used in this study is highly sensitive and seropositivity after vaccination is almost  
275 uniformly high. However, these binding antibody assays might not correlate with viral neutralization  
276 assays or accurately predict protection from future SARS-CoV-2 infection or severe COVID-19 and thus  
277 have limited clinical utility for assessing vaccine effectiveness.

278 Lastly, we found high levels of agreement between EHR and patient self-report via survey to  
279 ascertain prior COVID-19 vaccination or diagnosed SARS-CoV-2 infection as well as agreement between  
280 EHR or self-reported prior SARS-CoV2 spike antigen exposure and spike antibody test results. Given the  
281 transition in COVID-19 surveillance with ever greater reliance on EHR data to monitor COVID-19  
282 vaccination or SARS-COV-2 infections to guide policy decisions, this study provides reassurance that  
283 EHRs can be used for SARS-CoV-2 disease monitoring. These findings are comparable to other studies  
284 that have evaluated the concordance of EHR and survey data for SARS-CoV-2 infection.<sup>21</sup>

285 This study has several limitations. First, we only used spike antibody testing, which can be  
286 positive after either COVID-19 vaccination or SARS-CoV-2 infection but did not use an antibody test  
287 targeting the nucleocapsid antigen that can be used to detect SARS-CoV-2 infection alone. This has  
288 limited our ability to detect the full set of undiagnosed SARS-CoV-2 infections, particularly among  
289 vaccinated persons, and thus our estimate of persons with undiagnosed SARS-CoV-2 infection across the  
290 duration of the study is likely an underestimate. Second, although we have used standard population-  
291 based sampling and weighting methods, our overall response rate is modest and thus the respondent  
292 population may not be representative of the general population. This was mitigated in part by use of  
293 detailed EHR data on all sampled persons to create non-response weights. Additionally, some patients  
294 experience with SARS-CoV-2 may have made them more likely to remember an infection than others,  
295 which could potentially bias the results of the study.

296 In conclusion, we found that by the end of our study, 93.5% of persons were seropositive for  
297 spike antibody with the majority of seropositivity coming from COVID-19 vaccination. Seroprevalence  
298 was high among all groups except children aged 7-17 years, and almost all persons had detectable SARS-  
299 CoV-2 spike antibodies after COVID-19 vaccination. Within our healthcare system, COVID-19 vaccination  
300 was the main contributor to overall population-level seroprevalence.

301 **Acknowledgements**

302 All authors contributed to conceptual ideas and contributed to methodology. TCC, EPE, JRN  
303 contributed to formal analysis; TCC, JS contributed to writing and original draft preparation; All authors  
304 contributed to writing, reviewing, and editing the manuscript; JS supervised the work. The authors are  
305 grateful to all Kaiser Permanente members without whom this study would not have been possible.

306 This work was supported by the National Cancer Institute Serological Sciences Network  
307 (SeroNet) [U01 CA260584 to JS, LHK, DAC]; The Permanente Medical Group Delivery Science Grant (JS,  
308 LHK, DAC), and the Physician Researcher Program of The Permanente Medical Group Delivery Science  
309 and Applied Research Program (JS).

310 All authors: No conflicts of interest identified. All authors have submitted the ICMJE Form for  
311 Disclosure of Potential Conflicts of Interest. Conflicts that the editors consider relevant to the content of  
312 the manuscript have been disclosed.

313 **References**

- 314 1. CDC. COVID Data Tracker. Centers for Disease Control and Prevention. Published March 28, 2020.  
315 Accessed June 12, 2023. <https://covid.cdc.gov/covid-data-tracker>
- 316 2. Jones JM. Estimates of SARS-CoV-2 Seroprevalence and Incidence of Primary SARS-CoV-2 Infections  
317 Among Blood Donors, by COVID-19 Vaccination Status — United States, April 2021–September  
318 2022. *MMWR Morb Mortal Wkly Rep.* 2023;72. doi:10.15585/mmwr.mm7222a3
- 319 3. Li Z, Lewis B, Berney K, et al. Social vulnerability and rurality associated with higher SARS-CoV-2  
320 infection-induced seroprevalence: a nationwide blood donor study, United States, July 2020 – June  
321 2021. *Clin Infect Dis Off Publ Infect Dis Soc Am.* Published online February 7, 2022:ciac105.  
322 doi:10.1093/cid/ciac105
- 323 4. Clarke KEN. Seroprevalence of Infection-Induced SARS-CoV-2 Antibodies — United States,  
324 September 2021–February 2022. *MMWR Morb Mortal Wkly Rep.* 2022;71.  
325 doi:10.15585/mmwr.mm7117e3
- 326 5. Wiegand RE, Deng Y, Deng X, et al. Estimated SARS-CoV-2 antibody seroprevalence trends and  
327 relationship to reported case prevalence from a repeated, cross-sectional study in the 50 states and  
328 the District of Columbia, United States—October 25, 2020–February 26, 2022. *Lancet Reg Health –*  
329 *Am.* 2023;18. doi:10.1016/j.lana.2022.100403
- 330 6. Davis AC, Voelkel JL, Remmers CL, Adams JL, McGlynn EA. Comparing Kaiser Permanente Members  
331 to the General Population: Implications for Generalizability of Research. *Perm J.* 2023;27(2):87-98.  
332 doi:10.7812/TPP/22.172
- 333 7. DiaSorin Inc. LIASON SARS-CoV-2 S1/S2 IgG - Instructions for use. Accessed June 28, 2023.  
334 <https://www.fda.gov/media/137359/download>
- 335 8. Ainsworth M, Andersson M, Auckland K, et al. Performance characteristics of five immunoassays for  
336 SARS-CoV-2: a head-to-head benchmark comparison. *Lancet Infect Dis.* 2020;20(12):1390-1400.  
337 doi:10.1016/S1473-3099(20)30634-4
- 338 9. Charlson M, Szatrowski TP, Peterson J, Gold J. Validation of a combined comorbidity index. *J Clin*  
339 *Epidemiol.* 1994;47(11):1245-1251. doi:10.1016/0895-4356(94)90129-5
- 340 10. Laan MJ van der, Polley EC, Hubbard AE. Super Learner. *Stat Appl Genet Mol Biol.* 2007;6(1).  
341 doi:10.2202/1544-6115.1309
- 342 11. Rao JNK, Scott AJ. On Chi-Squared Tests for Multiway Contingency Tables with Cell Proportions  
343 Estimated from Survey Data. *Ann Stat.* 1984;12(1):46-60.
- 344 12. Zou G. A modified poisson regression approach to prospective studies with binary data. *Am J*  
345 *Epidemiol.* 2004;159(7):702-706. doi:10.1093/aje/kwh090
- 346 13. Lamba K, Bradley H, Shioda K, et al. SARS-CoV-2 Cumulative Incidence and Period Seroprevalence:  
347 Results From a Statewide Population-Based Serosurvey in California. *Open Forum Infect Dis.*  
348 2021;8(8):ofab379. doi:10.1093/ofid/ofab379

- 349 14. Mehrotra ML, Lim E, Lamba K, et al. CalScope: Monitoring Severe Acute Respiratory Syndrome  
350 Coronavirus 2 Seroprevalence From Vaccination and Prior Infection in Adults and Children in  
351 California May 2021–July 2021. *Open Forum Infect Dis.* 2022;9(7):ofac246. doi:10.1093/ofid/ofac246
- 352 15. Adams C, Horton M, Solomon O, et al. Health inequities in SARS-CoV-2 infection, seroprevalence,  
353 and COVID-19 vaccination: Results from the East Bay COVID-19 study. *PLOS Glob Public Health.*  
354 2022;2(8):e0000647. doi:10.1371/journal.pgph.0000647
- 355 16. Mehrotra M. CalScope Wave 2 Findings. Accessed June 29, 2023.  
356 [https://www.cdph.ca.gov/Programs/CID/DCDC/CDPH%20Document%20Library/COVID-](https://www.cdph.ca.gov/Programs/CID/DCDC/CDPH%20Document%20Library/COVID-19/CalScope/Wave2Findings.pdf)  
357 [19/CalScope/Wave2Findings.pdf](https://www.cdph.ca.gov/Programs/CID/DCDC/CDPH%20Document%20Library/COVID-19/CalScope/Wave2Findings.pdf)
- 358 17. Undiagnosed SARS-CoV-2 seropositivity during the first 6 months of the COVID-19 pandemic in the  
359 United States. doi:10.1126/scitranslmed.abh3826
- 360 18. Siegel M, Critchfield-Jain I, Boykin M, et al. Racial/Ethnic Disparities in State-Level COVID-19  
361 Vaccination Rates and Their Association with Structural Racism. *J Racial Ethn Health Disparities.*  
362 2022;9(6):2361-2374. doi:10.1007/s40615-021-01173-7
- 363 19. Malik AA, McFadden SM, Elharake J, Omer SB. Determinants of COVID-19 vaccine acceptance in the  
364 US. *EClinicalMedicine.* 2020;26:100495. doi:10.1016/j.eclinm.2020.100495
- 365 20. Dada D, Djiometio JN, McFadden SM, et al. Strategies That Promote Equity in COVID-19 Vaccine  
366 Uptake for Black Communities: a Review. *J Urban Health.* 2022;99(1):15-27. doi:10.1007/s11524-  
367 021-00594-3
- 368 21. Johnson RK, Marker KM, Mayer D, et al. COVID-19 Surveillance in the Biobank at the Colorado  
369 Center for Personalized Medicine: Observational Study. *JMIR Public Health Surveill.*  
370 2022;8(6):e37327. doi:10.2196/37327

371



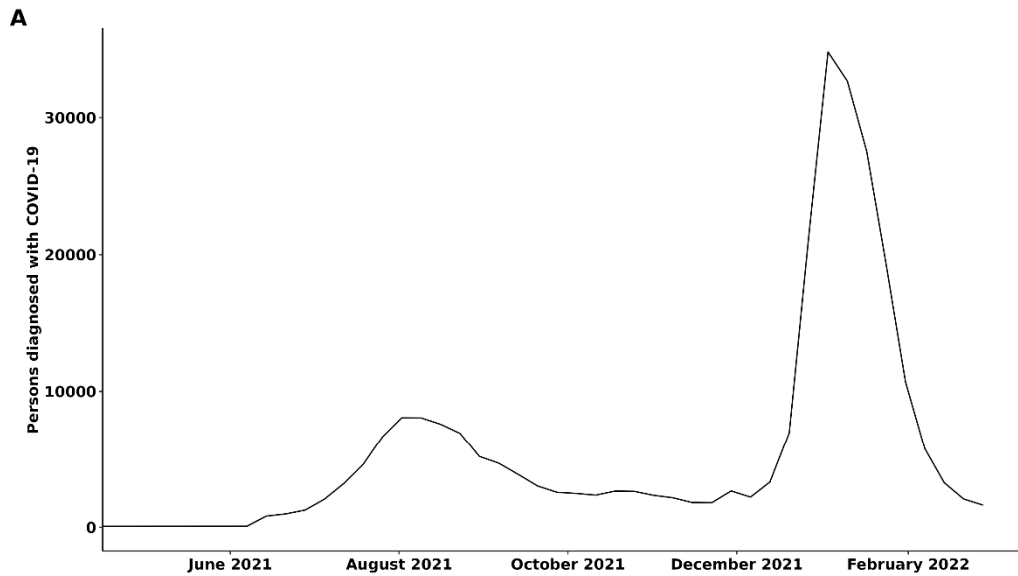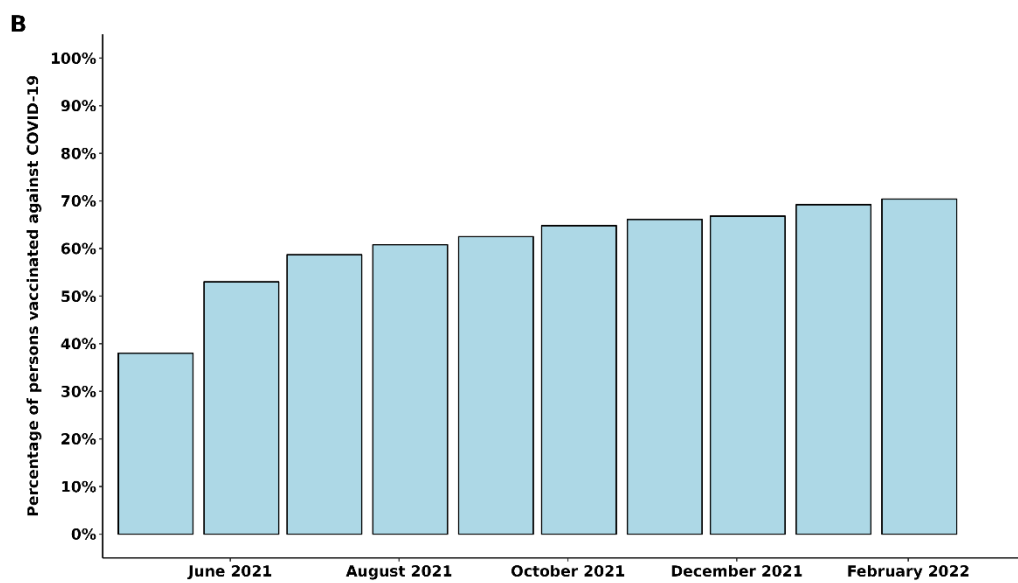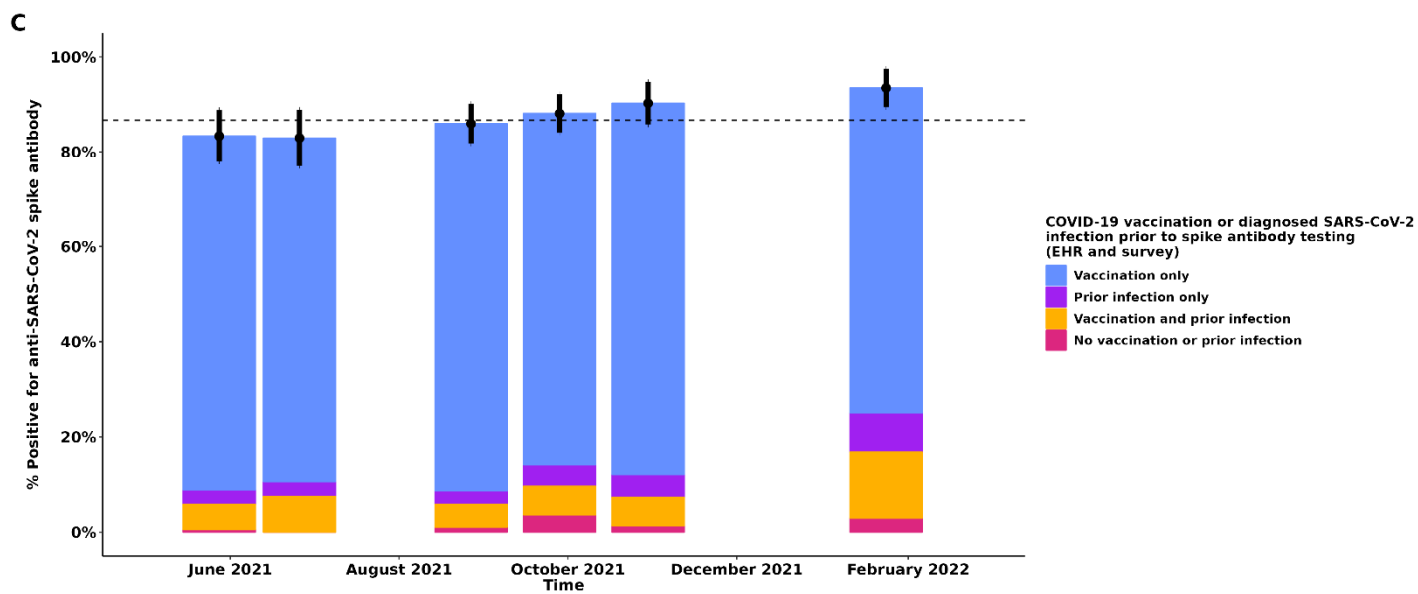

**Figure 1. Panel A.** COVID-19 cases diagnosed in Kaiser Permanente Northern California June 2021 – February 2022 by week. **Panel B.** Percentage of Kaiser Permanente Northern California members who have received at least one COVID-19 vaccine May 2021 – February 2022. **Panel C.** Relative contributions of COVID-19 vaccination, and diagnosed and undiagnosed SARS-CoV-2 infection to population-level prevalence of anti-SARS-CoV-2 spike protein antibody by recruitment wave, May 2021 – April 2022. The dashed line in Panel C represents the average level of seroprevalence across the study's duration.

Note: COVID-19 vaccination based on electronic health record or self-report on survey. Diagnosed SARS-CoV-2 infection was defined as a positive SARS-CoV-2 nucleic acid amplification test (NAAT) or antigen test recorded in the EHR or self-report of COVID-19 in the survey. Undiagnosed SARS-CoV-2 infection was defined as a positive spike antibody test among participants with no COVID-19 vaccination or diagnosed SARS-CoV-2 infection.

COVID-19 vaccination status was classified as: 1) Completed primary series, which includes persons who received one dose of Ad.26.COVS.2 or 2 doses of BNT162b2 or m-RNA-1273; 2) Completed primary series plus an additional dose, which includes persons who completed a primary series and received at least one additional dose of any COVID-19 vaccine (Ad.26.COVS.2, BNT162b2 or m-RNA-1273); 3) Other, which includes persons who received one dose of either BNT162b2 or m-RNA-1273, another vaccine product, or an unapproved combination of vaccines.

**Table 1.** Characteristics of eligible persons and prevalence of SARS-CoV-2 spike antibody positivity in Kaiser Permanente Northern California, May 2021 – April 2022.

| Characteristic                                                                                                 | Population |                                     | SARS-CoV-2 spike antibody positive |                    |         |
|----------------------------------------------------------------------------------------------------------------|------------|-------------------------------------|------------------------------------|--------------------|---------|
|                                                                                                                | N          | Weighted population size (column %) | N                                  | Weighted % (CI)    | p-value |
| <b>Total</b>                                                                                                   | 4,319      | 3,589,422 (100%)                    | 4,104                              | 87.5% (85.5, 89.4) |         |
| <b>Recruitment wave</b>                                                                                        |            |                                     |                                    |                    | 0.020   |
| 1 (May 2021 - August 2021)                                                                                     | 458        | 3,074,884 (14%)                     | 420                                | 83.3% (77.9, 88.8) |         |
| 2 (June 2021 - September 2021)                                                                                 | 556        | 3,530,422 (16%)                     | 518                                | 82.9% (77, 88.9)   |         |
| 3 (August 2021 - February 2022)                                                                                | 940        | 3,770,016 (18%)                     | 885                                | 86% (81.8, 90.1)   |         |
| 4 (September 2021 - January 2022)                                                                              | 897        | 3,752,643 (18%)                     | 854                                | 88.1% (84.1, 92.2) |         |
| 5 (October 2021 - February 2022)                                                                               | 717        | 3,817,245 (18%)                     | 689                                | 90.3% (85.8, 94.7) |         |
| 6 (January 2022 - April 2022)                                                                                  | 751        | 3,482,437 (16%)                     | 738                                | 93.5% (89.5, 97.5) |         |
| <b>Age group (years)</b>                                                                                       |            |                                     |                                    |                    | <0.001  |
| 7-17                                                                                                           | 72         | 253,384 (7.0%)                      | 48                                 | 63.3% (50.2, 76.4) |         |
| 18-44                                                                                                          | 1,062      | 1,475,697 (41%)                     | 986                                | 86.3% (83, 89.6)   |         |
| 45-64                                                                                                          | 1,743      | 1,160,236 (32%)                     | 1,664                              | 90.1% (87.7, 92.6) |         |
| 65+                                                                                                            | 1,442      | 700,106 (20%)                       | 1,406                              | 94.1% (91.6, 96.7) |         |
| <b>Sex</b>                                                                                                     |            |                                     |                                    |                    | >0.9    |
| Female                                                                                                         | 2,751      | 1,988,539 (56%)                     | 2,622                              | 87.4% (84.9, 89.9) |         |
| Male                                                                                                           | 1,568      | 1,600,883 (44%)                     | 1,482                              | 87.5% (84.6, 90.5) |         |
| <b>Race/Ethnicity</b>                                                                                          |            |                                     |                                    |                    | 0.011   |
| White                                                                                                          | 2,947      | 1,631,062 (45%)                     | 2,794                              | 85.3% (82.9, 87.7) |         |
| Asian                                                                                                          | 493        | 755,468 (21%)                       | 484                                | 94.3% (90.4, 98.1) |         |
| Black                                                                                                          | 352        | 215,929 (6.0%)                      | 325                                | 80.6% (74.1, 87.2) |         |
| Hispanic                                                                                                       | 371        | 665,137 (19%)                       | 356                                | 89.4% (84.2, 94.6) |         |
| Other                                                                                                          | 156        | 321,826 (8.9%)                      | 145                                | 82.9% (73.1, 92.7) |         |
| <b>Geographic area</b>                                                                                         |            |                                     |                                    |                    | 0.003   |
| Central valley                                                                                                 | 326        | 357,636 (9.9%)                      | 298                                | 81.1% (73.4, 88.8) |         |
| East bay                                                                                                       | 1,169      | 1,004,297 (28%)                     | 1,129                              | 90.9% (87.7, 94.1) |         |
| North bay                                                                                                      | 458        | 244,449 (6.9%)                      | 442                                | 92% (87.9, 96.1)   |         |
| North valley                                                                                                   | 1,220      | 978,828 (27%)                       | 1,136                              | 83.7% (79.9, 87.5) |         |
| Peninsula                                                                                                      | 516        | 411,390 (12%)                       | 502                                | 93.5% (89.2, 97.7) |         |
| South bay                                                                                                      | 630        | 592,821 (16%)                       | 597                                | 85.6% (79.9, 91.2) |         |
| <b>Charlson score category</b>                                                                                 |            |                                     |                                    |                    | 0.3     |
| No visits in prior year                                                                                        | 125        | 280,587 (7.8%)                      | 114                                | 83.9% (74.2, 93.6) |         |
| Score 0                                                                                                        | 2,647      | 2,315,506 (64%)                     | 2,510                              | 86.6% (84.2, 89.1) |         |
| Score 1                                                                                                        | 749        | 482,293 (13%)                       | 720                                | 89.9% (85.8, 94)   |         |
| Score 2                                                                                                        | 370        | 198,729 (5.6%)                      | 355                                | 91.6% (86.9, 96.3) |         |
| Score 3+                                                                                                       | 428        | 312,307 (8.8%)                      | 405                                | 90.4% (85.1, 95.6) |         |
| <b>Chronic obstructive pulmonary disease</b>                                                                   | 582        | 388,464 (11%)                       | 557                                | 90.4% (86.1, 94.8) | 0.2     |
| <b>Chronic kidney disease</b>                                                                                  | 246        | 173,981 (4.9%)                      | 233                                | 88% (79.6, 96.4)   | 0.9     |
| <b>Atherosclerotic cardiovascular disease</b>                                                                  | 769        | 425,534 (12%)                       | 736                                | 91.3% (88.2, 94.5) | 0.039   |
| <b>Cancer/Malignancies</b>                                                                                     | 196        | 117,166 (3.3%)                      | 184                                | 93% (88.8, 97.1)   | 0.047   |
| <b>Diabetes</b>                                                                                                | 441        | 342,493 (9.6%)                      | 425                                | 91.7% (86.6, 96.7) | 0.2     |
| <b>BMI category</b>                                                                                            |            |                                     |                                    |                    | <0.001  |
| 18.5 - <25                                                                                                     | 1,281      | 966,367 (27%)                       | 1,228                              | 90% (86.8, 93.2)   |         |
| 25 - <30                                                                                                       | 1,476      | 1,088,391 (30%)                     | 1,416                              | 91.2% (88.6, 93.8) |         |
| 30 - <40                                                                                                       | 1,174      | 951,293 (27%)                       | 1,105                              | 83.9% (79.9, 88)   |         |
| >= 40                                                                                                          | 254        | 189,514 (5.3%)                      | 243                                | 91.4% (85.7, 97.1) |         |
| Unknown                                                                                                        | 134        | 393,857 (11%)                       | 112                                | 77.4% (68.2, 86.7) |         |
| <b>COVID-19 vaccination or diagnosed SARS-CoV-2 infection prior to spike antibody testing (EHR and survey)</b> |            |                                     |                                    |                    | <0.001  |
| Neither                                                                                                        | 195        | 460,642 (13%)                       | 22                                 | 12.7% (6.7, 18.7)  |         |
| Prior infection only                                                                                           | 81         | 178,615 (5.0%)                      | 70                                 | 88.5% (81, 96)     |         |
| Vaccinated and prior infection                                                                                 | 326        | 257,045 (7.2%)                      | 326                                | 100% (100, 100)    |         |
| Vaccinated only                                                                                                | 3,717      | 2,693,119 (75%)                     | 3,686                              | 99% (98.5, 99.5)   |         |
| <b>Vaccination series</b>                                                                                      |            |                                     |                                    |                    | <0.001  |
| Not vaccinated                                                                                                 | 289        | 669,857 (19%)                       | 103                                | 36.3% (29.3, 43.4) |         |
| Partial                                                                                                        | 43         | 95,977 (2.8%)                       | 42                                 | 97% (91.2, 100)    |         |
| Primary series complete                                                                                        | 3,162      | 2,477,006 (69%)                     | 3,135                              | 99.2% (98.8, 99.6) |         |
| Primary series + additional dose                                                                               | 825        | 346,583 (9.8%)                      | 824                                | 99.9% (99.7, 100)  |         |
| <b>Vaccination status at blood draw time</b>                                                                   |            |                                     |                                    |                    | <0.001  |
| Ad26.COV2.S (Janssen)                                                                                          | 192        | 148,530 (4.2%)                      | 187                                | 96.1% (91.2, 100)  |         |

|                                              |       |                 |       |                    |        |
|----------------------------------------------|-------|-----------------|-------|--------------------|--------|
| BNT162b2 (Pfizer/BioNTech)                   | 2,107 | 1,619,133 (45%) | 2,094 | 99.5% (99.2, 99.8) |        |
| mRNA-1273 (Moderna/NIH)                      | 1,731 | 1,151,903 (32%) | 1,720 | 99.2% (98.6, 99.8) |        |
| Unvaccinated                                 | 289   | 669,857 (19%)   | 103   | 36.3% (29.3, 43.4) |        |
| <b>Vaccination in medical records</b>        | 4,030 | 2,919,565 (81%) | 4,001 | 99.2% (98.8, 99.6) | <0.001 |
| <b>COVID-19 diagnosis in medical records</b> | 311   | 303,276 (8.5%)  | 303   | 95.3% (91.7, 99)   | 0.005  |
| <b>Indicated vaccination in survey</b>       | 3,927 | 2,861,173 (80%) | 3,900 | 99.3% (98.9, 99.6) | <0.001 |
| <b>Indicated infection in survey</b>         | 375   | 405,050 (11%)   | 365   | 95.8% (92.9, 98.7) | <0.001 |

CI=95% confidence interval; EHR=electronic health record

P-values calculated using chi-squared test with Rao & Scott's correction for assessing the distribution of SARS-CoV-2 spike antibody positivity by population characteristics.

COVID-19 vaccination based on electronic health record or self-report on survey. Diagnosed SARS-CoV-2 infection was defined as a positive SARS-CoV-2 nucleic acid amplification test (NAAT) or antigen test recorded in the electronic health record or self-report of COVID-19 in the survey. Undiagnosed SARS-CoV-2 infection was defined as a positive spike antibody test among participants with no COVID-19 vaccination or diagnosed SARS-CoV-2 infection.

**Table 2.** Relative contributions of COVID-19 vaccination, and diagnosed and undiagnosed SARS-CoV-2 infection to population-level prevalence of anti-SARS-CoV-2 spike protein antibody by recruitment wave in Kaiser Permanente Northern California, May 2021 – April 2022.

| Wave         | Median blood draw date | COVID-19 vaccination only |                   | Prior diagnosed SARS-CoV-2 infection only |                 | COVID-19 vaccination and prior diagnosed SARS-CoV-2 infection |                   | Undiagnosed SARS-CoV-2 infection only |                 | Total |                   |
|--------------|------------------------|---------------------------|-------------------|-------------------------------------------|-----------------|---------------------------------------------------------------|-------------------|---------------------------------------|-----------------|-------|-------------------|
|              |                        | n                         | Weighted % (CI)   | n                                         | Weighted % (CI) | n                                                             | Weighted % (CI)   | n                                     | Weighted % (CI) | n     | Weighted % (CI)   |
| 1            | May 5, 2021            | 390                       | 74.5 (67.9, 80.1) | 6                                         | 3.0 (1.2, 7.4)  | 23                                                            | 5.3 (3.1, 9.0)    | 1                                     | 0.6 (0.1, 3.8)  | 420   | 83.3 (77.9, 88.8) |
| 2            | June 26, 2021          | 471                       | 72.3 (65.4, 78.3) | 6                                         | 3.1 (1.2, 8.2)  | 41                                                            | 7.5 (4.8, 11.6)   | 0                                     | 0 (0, 0)        | 518   | 82.9 (77.0, 88.9) |
| 3            | August 27, 2021        | 810                       | 77.3 (72.5, 81.4) | 16                                        | 2.9 (1.7, 4.8)  | 55                                                            | 4.8 (3.4, 6.8)    | 4                                     | 1.1 (0.4, 3.0)  | 885   | 86.0 (81.8, 90.1) |
| 4            | September 28, 2021     | 765                       | 74.0 (68.6, 78.7) | 15                                        | 4.5 (2.4, 8.3)  | 65                                                            | 6.0 (4.5, 8.0)    | 9                                     | 3.6 (1.7, 7.7)  | 854   | 88.1 (84.1, 92.2) |
| 5            | October 30, 2021       | 627                       | 78.2 (72.3, 83.1) | 12                                        | 4.8 (2.5, 8.9)  | 48                                                            | 5.9 (4.2, 8.4)    | 2                                     | 1.4 (0.3, 6.2)  | 689   | 90.3 (85.8, 94.7) |
| 6            | January 24, 2022       | 623                       | 68.5 (61.9, 74.3) | 15                                        | 8.2 (4.5, 14.5) | 94                                                            | 13.9 (10.7, 17.9) | 6                                     | 2.9 (1.1, 7.6)  | 738   | 93.5 (89.5, 97.5) |
| <b>Total</b> |                        | 3,686                     | 74.2 (71.9, 76.4) | 70                                        | 4.42 (3.3, 5.9) | 326                                                           | 7.2 (6.2, 8.3)    | 22                                    | 1.6 (1.0, 2.7)  | 4,104 | 87.5 (85.5, 89.4) |

Note: COVID-19 vaccination based on electronic health record or self-report on survey. Diagnosed SARS-CoV-2 infection was defined as a positive SARS-CoV-2 nucleic acid amplification test (NAAT) or antigen test recorded in the electronic health record or self-report of COVID-19 in the survey. Undiagnosed SARS-CoV-2 infection was defined as a positive spike antibody test among participants with no COVID-19 vaccination or diagnosed SARS-CoV-2 infection.

**Table 3.** SARS-CoV-2 spike antibody seropositivity and factors associated with seropositivity among persons with SARS-CoV-2 spike protein seropositivity among persons who completed at least a COVID-19 primary vaccination series and had no history of diagnosed SARS-CoV-2 infection, Kaiser Permanente Northern California, May 2021 – January 2022

| Characteristic                                | N =<br>3,739 | % Seropositive (95% CI) | Prevalence Ratio | 95% CI     | p-value |
|-----------------------------------------------|--------------|-------------------------|------------------|------------|---------|
| <b>Age group (years)</b>                      |              |                         |                  |            |         |
| 18-44                                         | 816          | 98.5% (95.4, 100)       | —                | —          |         |
| 7-17                                          | 33           | 99.5% (98.8, 100)       | 0.99             | 0.96, 1.02 | 0.38    |
| 45-64                                         | 1,476        | 99.3% (98.9, 99.8)      | 1.00             | 0.99, 1.01 | 0.73    |
| 65+                                           | 1,344        | 98.7% (97.9, 99.4)      | 1.01             | 1.00, 1.02 | 0.11    |
| <b>Sex</b>                                    |              |                         |                  |            |         |
| Male                                          | 1,354        | 99.5% (99.2, 99.8)      | —                | —          |         |
| Female                                        | 2,315        | 98.8% (98.1, 99.6)      | 1.01             | 1.00, 1.01 | 0.24    |
| <b>Race/Ethnicity</b>                         |              |                         |                  |            |         |
| White                                         | 2,544        | 98.7% (98.2, 99.3)      | —                | —          |         |
| Asian                                         | 445          | 100% (100, 100)         | 1.01             | 1.00, 1.01 | 0.002   |
| Black                                         | 274          | 100% (100, 100)         | 1.01             | 1.01, 1.02 | <0.001  |
| Hispanic                                      | 277          | 99.1% (97.3, 100)       | 1.00             | 0.99, 1.02 | 0.81    |
| Other                                         | 129          | 99.3% (97.9, 100)       | 1.00             | 0.98, 1.02 | 0.77    |
| <b>Charlson score category</b>                |              |                         |                  |            |         |
| Score 0                                       | 2,205        | 100% (100, 100)         | —                | —          |         |
| Score 1                                       | 651          | 99.5% (99, 100)         | 1.00             | 0.98, 1.01 | 0.79    |
| Score 2                                       | 330          | 99.8% (99.5, 100)       | 1.00             | 0.97, 1.04 | 0.86    |
| Score 3+                                      | 379          | 99.2% (98.4, 100)       | 0.99             | 0.94, 1.05 | 0.75    |
| No visits in prior year                       | 104          | 95.8% (93.5, 98.1)      | 1.01             | 1.00, 1.01 | 0.050   |
| <b>Chronic obstructive pulmonary disease</b>  | 495          | 99.2% (98.4, 99.9)      | 1.01             | 0.99, 1.02 | 0.41    |
| <b>Chronic kidney Disease</b>                 | 225          | 95.3% (91.9, 98.7)      | 0.97             | 0.92, 1.01 | 0.17    |
| <b>Atherosclerotic cardiovascular disease</b> | 686          | 97.1% (95.5, 98.7)      | 0.98             | 0.97, 1.00 | 0.11    |
| <b>Cancer/Malignancies</b>                    | 179          | 92.7% (88.3, 97.1)      | 0.94             | 0.89, 1.00 | 0.066   |
| <b>Diabetes</b>                               | 379          | 99.3% (98.5, 100)       | 1.02             | 0.99, 1.04 | 0.25    |
| <b>BMI Category</b>                           |              |                         |                  |            |         |
| 18.5 - <25                                    | 1,121        | 99.3% (98.9, 99.8)      | —                | —          |         |
| 25 - <30                                      | 1,282        | 99.4% (99, 99.8)        | 1.00             | 1.00, 1.01 | 0.29    |
| 30 - <40                                      | 970          | 98.8% (97.6, 100)       | 1.00             | 0.99, 1.01 | 0.89    |
| >= 40                                         | 202          | 99.1% (98.1, 100)       | 1.00             | 0.98, 1.01 | 0.59    |
| Unknown                                       | 94           | 99.4% (98.2, 100)       | 1.00             | 1.0, 1.01  | 0.41    |
| <b>Vaccine type at enrollment</b>             |              |                         |                  |            |         |
| BNT162b2 (Pfizer/BioNTech)                    | 1,910        | 95.7% (90.3, 100)       | —                | —          |         |
| Ad26.COV2.S (Janssen)                         | 163          | 99.4% (99.1, 99.8)      | 0.96             | 0.91, 1.02 | 0.18    |
| mRNA-1273 (Moderna/NIH)                       | 1,596        | 99.4% (99, 99.8)        | 1.00             | 0.99, 1.01 | 0.83    |
| <b>Vaccination status at blood draw time</b>  |              |                         |                  |            |         |
| Primary series complete                       | 2,909        | 99.1% (98.7, 99.6)      | —                | —          |         |
| Primary series + additional dose              | 760          | 99.9% (99.7, 100)       | 1.01             | 1.00, 1.02 | 0.019   |
| <b>Months since last vaccination</b>          |              |                         |                  |            |         |
| <1 month                                      | 334          | 100% (100, 100)         | —                | —          |         |
| 1 - 2 months                                  | 940          | 99.2% (98.6, 99.8)      | 1.00             | 0.99, 1.01 | 0.80    |
| 3 - 4 months                                  | 974          | 98.8% (97.7, 99.9)      | 0.99             | 0.99, 1.00 | 0.17    |
| >=5 months                                    | 1,421        | 99.4% (98.9, 99.9)      | 1.00             | 0.99, 1.01 | 0.80    |

CI = 95% confidence interval; EHR = electronic health record

Model adjusting for age group in years, sex, race/ethnicity, charlson comorbidity index score, chronic obstructive pulmonary disease status, chronic kidney disease status, atherosclerotic cardiovascular disease status, cancer status, diabetes status, body mass index category, COVID-19 vaccination series in the EHR, COVID-19 vaccination product in the EHR, and months since vaccination

**Table 4.** Concordance of data from electronic health record and patient self-report on electronic survey for COVID-19 vaccination and prior diagnosed SARS-CoV-2 infection status in Kaiser Permanente Northern California, May 2021 – April 2022 (N=4,220).

|                                                  | <b>COVID-19 vaccination</b> | <b>Prior diagnosed SARS-CoV-2 infection</b> |
|--------------------------------------------------|-----------------------------|---------------------------------------------|
| <b>In EHR and survey (Concordant)</b>            | 3914                        | 279                                         |
| <b>Not in EHR and not in survey (Concordant)</b> | 271                         | 3818                                        |
| <b>In EHR and not in survey (Discordant)</b>     | 22                          | 27                                          |
| <b>Not in EHR, but in survey (Discordant)</b>    | 13                          | 96                                          |
|                                                  |                             |                                             |
| <b>Sensitivity</b>                               | 99.7%                       | 74.4%                                       |
| <b>Specificity</b>                               | 92.5%                       | 99.3%                                       |
| <b>Positive predictive value</b>                 | 99.4%                       | 88.2%                                       |
| <b>Negative predictive value</b>                 | 95.6%                       | 98.2%                                       |
| <b>Agreement</b>                                 | 99.1%                       | 97.1%                                       |

EHR = electronic health record

Note: Sensitivity, specificity, positive and negative predictive value calculated using self-reported data from electronic survey on COVID-19 vaccination and prior diagnosed SARS-CoV-2 infection as the “gold standard”  
 Agreement is defined as sum of concordant results over the total.

**Table 5:** Concordance of COVID-19 vaccination and diagnosed SARS-CoV-2 infection status and SARS-CoV-2 spike antibody results in Kaiser Permanente Northern California, May 2021 – April 2022 (N=4,319)

|                                                                                                       | <b>Spike antibody positive</b> |
|-------------------------------------------------------------------------------------------------------|--------------------------------|
| <b>Prior COVID-19 vaccination or SARS-CoV-2 infection and spike antibody positive (Concordant)</b>    | 4082                           |
| <b>No prior COVID-19 vaccination or SARS-CoV-2 infection and spike antibody negative (Concordant)</b> | 173                            |
| <b>Prior COVID-19 vaccination or SARS-CoV-2 infection and spike antibody negative (Discordant)</b>    | 42                             |
| <b>No prior COVID-19 vaccination or SARS-CoV-2 infection and spike antibody positive (Discordant)</b> | 22                             |
|                                                                                                       |                                |
| <b>Sensitivity</b>                                                                                    | 99.5%                          |
| <b>Specificity</b>                                                                                    | 80.5%                          |
| <b>Positive predictive value</b>                                                                      | 98.9%                          |
| <b>Negative predictive value</b>                                                                      | 89.7%                          |
| <b>Agreement</b>                                                                                      | 98.5%                          |

EHR = electronic health record

Note: Sensitivity, specificity, positive and negative predictive value calculated using SARS-CoV-2 spike antibody test results as the “gold standard”

Agreement is defined as sum of concordant results divided by the total.



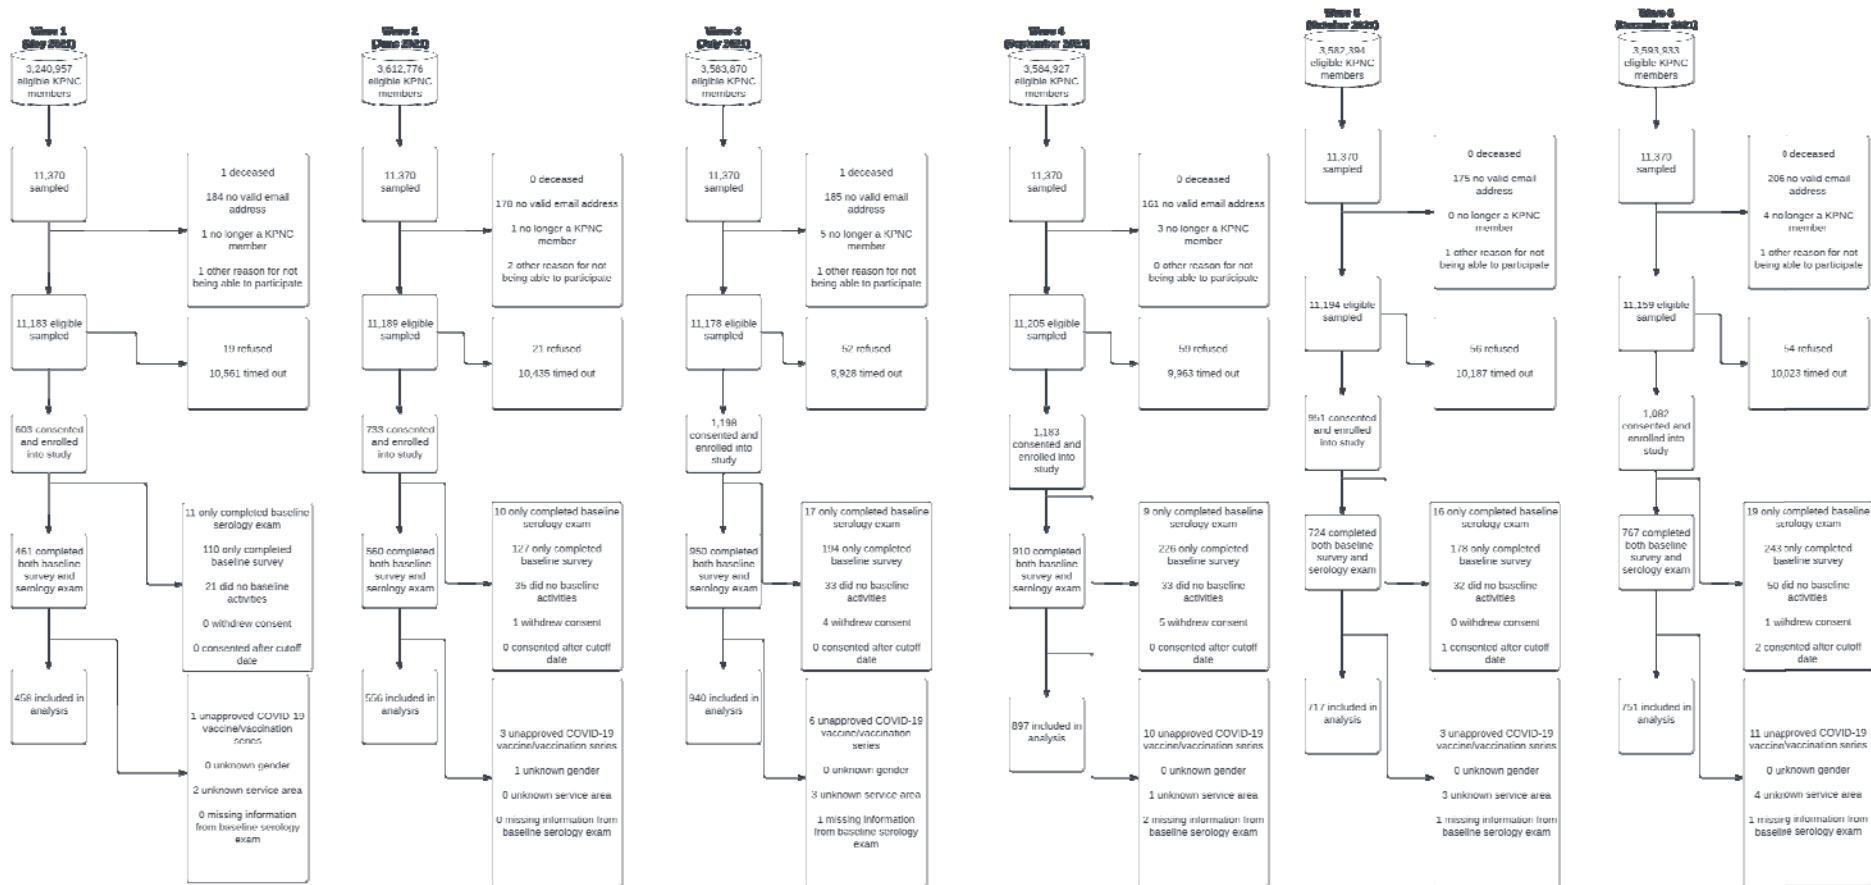

**Supplemental figure 1.** Sampling, inclusions, and exclusions from the Kaiser Permanente Northern California member population May 2021 – December 2021 that lead to the creation of our study population. To be eligible for sampling, members needed to be enrolled in Kaiser Permanente Northern California membership for at least two months prior to the sampling date, be at least 7 years old on the sampling date, not listed in the “Do not contact” file for study participation, and had not been invited to a previous to a previous Kaiser Permanente Northern California COVID-19 serology study. Wave 1 only included English speaking members.

**Supplementary Table 1:** Characteristics of the eligible Kaiser Permanente Northern California (KPNC) population May 2021 – April 2022 and non-respondent sampled population compared to respondent population before and after weighting.

| Characteristic                                | Before non-response weighting         |                                  |      | After non-response weighting          |                                  |      | Comparison with KPNC population         |                                      |      |
|-----------------------------------------------|---------------------------------------|----------------------------------|------|---------------------------------------|----------------------------------|------|-----------------------------------------|--------------------------------------|------|
|                                               | Non-respondent population, N = 63,269 | Respondent population, N = 4,319 | SMD  | Non-respondent population, N = 63,269 | Respondent population, N = 4,319 | SMD  | Eligible KPNC population, N = 3,498,764 | Respondent population, N = 3,571,275 | SMD  |
| <b>Age group (years)</b>                      |                                       |                                  | 0.64 |                                       |                                  | 0.14 |                                         |                                      | 0.10 |
| 7-17                                          | 6,319 (10%)                           | 72 (1.7%)                        |      | 6,319 (10%)                           | 72 (7.0%)                        |      | 333,650 (9.5%)                          | 250,210 (7.0%)                       |      |
| 18-44                                         | 27,250 (44%)                          | 1,062 (25%)                      |      | 27,250 (44%)                          | 1,062 (41%)                      |      | 1,478,525 (42%)                         | 1,467,581 (41%)                      |      |
| 45-64                                         | 18,943 (29%)                          | 1,743 (40%)                      |      | 18,943 (29%)                          | 1,743 (32%)                      |      | 1,051,877 (30%)                         | 1,155,306 (32%)                      |      |
| 65+                                           | 10,757 (17%)                          | 1,442 (34%)                      |      | 10,757 (17%)                          | 1,442 (20%)                      |      | 634,712 (18%)                           | 698,178 (20%)                        |      |
| <b>Sex</b>                                    |                                       |                                  | 0.23 |                                       |                                  | 0.07 |                                         |                                      | 0.06 |
| Female                                        | 33,239 (52%)                          | 2,751 (63%)                      |      | 33,239 (52%)                          | 2,751 (56%)                      |      | 1,840,164 (53%)                         | 1,983,715 (56%)                      |      |
| Male                                          | 30,030 (48%)                          | 1,568 (37%)                      |      | 30,030 (48%)                          | 1,568 (44%)                      |      | 1,658,599 (47%)                         | 1,587,559 (44%)                      |      |
| <b>Race/Ethnicity</b>                         |                                       |                                  | 0.65 |                                       |                                  | 0.10 |                                         |                                      | 0.06 |
| Asian                                         | 11,595 (21%)                          | 493 (12%)                        |      | 11,595 (21%)                          | 493 (21%)                        |      | 720,161 (21%)                           | 750,752 (21%)                        |      |
| Black                                         | 11,899 (7.0%)                         | 352 (2.8%)                       |      | 11,899 (7.0%)                         | 352 (6.0%)                       |      | 234,344 (6.7%)                          | 215,024 (6.0%)                       |      |
| Hispanic                                      | 11,777 (21%)                          | 371 (8.9%)                       |      | 11,777 (21%)                          | 371 (19%)                        |      | 690,766 (20%)                           | 662,280 (19%)                        |      |
| Other                                         | 4,963 (10%)                           | 156 (4.4%)                       |      | 4,963 (10%)                           | 156 (8.9%)                       |      | 346,479 (9.9%)                          | 318,404 (8.9%)                       |      |
| White                                         | 23,035 (41%)                          | 2,947 (71%)                      |      | 23,035 (41%)                          | 2,947 (45%)                      |      | 1,507,014 (43%)                         | 1,624,815 (45%)                      |      |
| <b>Geographic Area</b>                        |                                       |                                  | 0.21 |                                       |                                  | 0.06 |                                         |                                      | 0.05 |
| Central Valley                                | 7,361 (12%)                           | 326 (7.2%)                       |      | 7,361 (12%)                           | 326 (9.9%)                       |      | 401,410 (11%)                           | 355,054 (9.9%)                       |      |
| East Bay                                      | 18,319 (27%)                          | 1,169 (27%)                      |      | 18,319 (27%)                          | 1,169 (28%)                      |      | 950,281 (27%)                           | 1,000,824 (28%)                      |      |
| North Bay                                     | 3,941 (6.8%)                          | 458 (11%)                        |      | 3,941 (6.8%)                          | 458 (6.9%)                       |      | 248,204 (7.1%)                          | 244,676 (6.9%)                       |      |
| North Valley                                  | 17,485 (27%)                          | 1,220 (28%)                      |      | 17,485 (27%)                          | 1,220 (27%)                      |      | 936,180 (27%)                           | 973,315 (27%)                        |      |
| Peninsula                                     | 7,006 (12%)                           | 516 (12%)                        |      | 7,006 (12%)                           | 516 (12%)                        |      | 411,419 (12%)                           | 410,996 (12%)                        |      |
| South Bay                                     | 9,157 (16%)                           | 630 (15%)                        |      | 9,157 (16%)                           | 630 (16%)                        |      | 551,270 (16%)                           | 586,408 (16%)                        |      |
| <b>Charlson score category</b>                |                                       |                                  | 0.40 |                                       |                                  | 0.16 |                                         |                                      | 0.14 |
| No visits in prior year                       | 7,671 (13%)                           | 125 (3.1%)                       |      | 7,671 (13%)                           | 125 (7.8%)                       |      | 419,085 (12%)                           | 279,049 (7.8%)                       |      |
| Score 0                                       | 39,155 (62%)                          | 2,647 (62%)                      |      | 39,155 (62%)                          | 2,647 (64%)                      |      | 2,182,429 (62%)                         | 2,297,304 (64%)                      |      |
| Score 1                                       | 8,133 (12%)                           | 749 (17%)                        |      | 8,133 (12%)                           | 749 (13%)                        |      | 446,424 (13%)                           | 482,110 (13%)                        |      |
| Score 2                                       | 3,276 (5.0%)                          | 370 (8.4%)                       |      | 3,276 (5.0%)                          | 370 (5.6%)                       |      | 182,307 (5.2%)                          | 199,918 (5.6%)                       |      |
| Score 3+                                      | 5,034 (7.5%)                          | 428 (9.7%)                       |      | 5,034 (7.5%)                          | 428 (8.8%)                       |      | 268,517 (7.7%)                          | 312,894 (8.8%)                       |      |
| <b>Chronic obstructive pulmonary disease</b>  | 6,514 (9.7%)                          | 582 (13%)                        | 0.11 | 6,514 (9.7%)                          | 582 (11%)                        | 0.04 | 347,546 (9.9%)                          | 388,816 (11%)                        | 0.03 |
| <b>Chronic kidney disease</b>                 | 2,960 (4.4%)                          | 246 (5.5%)                       | 0.05 | 2,960 (4.4%)                          | 246 (4.9%)                       | 0.03 | 155,094 (4.4%)                          | 175,862 (4.9%)                       | 0.02 |
| <b>Atherosclerotic cardiovascular disease</b> | 7,195 (11%)                           | 769 (18%)                        | 0.19 | 7,195 (11%)                           | 769 (12%)                        | 0.02 | 406,301 (12%)                           | 425,290 (12%)                        | 0.01 |
| <b>Cancer/Malignancies</b>                    | 1,495 (2.3%)                          | 196 (4.5%)                       | 0.12 | 1,495 (2.3%)                          | 196 (3.3%)                       | 0.06 | 84,570 (2.4%)                           | 116,343 (3.3%)                       | 0.05 |
| <b>Diabetes</b>                               | 6,447 (9.6%)                          | 441 (9.8%)                       | 0.00 | 6,447 (9.6%)                          | 441 (9.6%)                       | 0.00 | 337,823 (9.7%)                          | 343,536 (9.6%)                       | 0.00 |
| <b>Body mass index category</b>               |                                       |                                  | 0.47 |                                       |                                  | 0.18 |                                         |                                      | 0.15 |
| 18.5 - <25                                    | 15,581 (26%)                          | 1,281 (31%)                      |      | 15,581 (26%)                          | 1,281 (27%)                      |      | 910,036 (26%)                           | 961,658 (27%)                        |      |
| 25 - <30                                      | 17,390 (28%)                          | 1,476 (34%)                      |      | 17,390 (28%)                          | 1,476 (30%)                      |      | 989,570 (28%)                           | 1,083,245 (30%)                      |      |
| 30 - <40                                      | 16,129 (24%)                          | 1,174 (26%)                      |      | 16,129 (24%)                          | 1,174 (27%)                      |      | 853,304 (24%)                           | 947,381 (27%)                        |      |
| >= 40                                         | 3,858 (5.2%)                          | 254 (5.4%)                       |      | 3,858 (5.2%)                          | 254 (5.3%)                       |      | 183,351 (5.2%)                          | 189,048 (5.3%)                       |      |
| Unknown                                       | 10,311 (17%)                          | 134 (3.2%)                       |      | 10,311 (17%)                          | 134 (11%)                        |      | 562,502 (16%)                           | 389,942 (11%)                        |      |
| <b>Immunity status at baseline</b>            |                                       |                                  | 0.54 |                                       |                                  | 0.28 |                                         |                                      | 0.25 |
| Neither                                       | 14,601 (22%)                          | 195 (4.3%)                       |      | 14,601 (22%)                          | 195 (13%)                        |      | 720,428 (21%)                           | 458,920 (13%)                        |      |
| Prior infection only                          | 1,604 (2.4%)                          | 81 (1.8%)                        |      | 1,604 (2.4%)                          | 81 (5.0%)                        |      | 82,603 (2.4%)                           | 178,472 (5.0%)                       |      |

|                                       |              |             |      |              |             |      |                 |                 |      |
|---------------------------------------|--------------|-------------|------|--------------|-------------|------|-----------------|-----------------|------|
| Vaccinated and prior infection        | 3,180 (5.0%) | 326 (7.4%)  |      | 3,180 (5.0%) | 326 (7.2%)  |      | 182,011 (5.2%)  | 257,158 (7.2%)  |      |
| Vaccinated only                       | 43,884 (71%) | 3,717 (86%) |      | 43,884 (71%) | 3,717 (75%) |      | 2,513,721 (72%) | 2,676,725 (75%) |      |
| <b>Vaccination series at baseline</b> |              |             | 0.62 |              |             | 0.16 |                 |                 | 0.12 |
| Not vaccinated                        | 16,247 (24%) | 289 (6.4%)  |      | 16,247 (24%) | 289 (19%)   |      | 806,138 (23%)   | 667,483 (19%)   |      |
| Partial                               | 2,504 (3.8%) | 43 (0.9%)   |      | 2,504 (3.8%) | 43 (2.8%)   |      | 125,733 (3.6%)  | 100,174 (2.8%)  |      |
| Primary series complete               | 39,680 (64%) | 3,162 (73%) |      | 39,680 (64%) | 3,162 (69%) |      | 2,259,042 (65%) | 2,454,131 (69%) |      |
| Primary series + additional dose      | 4,838 (8.0%) | 825 (19%)   |      | 4,838 (8.0%) | 825 (9.8%)  |      | 307,851 (8.8%)  | 349,486 (9.8%)  |      |
| <b>Vaccine type at baseline</b>       |              |             | 0.54 |              |             | 0.16 |                 |                 | 0.13 |
| Ad26.COV2.S (Janssen)                 | 3,000 (4.7%) | 192 (4.4%)  |      | 3,000 (4.7%) | 192 (4.2%)  |      | 164,981 (4.7%)  | 148,658 (4.2%)  |      |
| BNT162b2 (Pfizer/BioNTech)            | 27,790 (45%) | 2,107 (49%) |      | 27,790 (45%) | 2,107 (45%) |      | 1,578,260 (45%) | 1,610,704 (45%) |      |
| mRNA-1273 (Moderna/NIH)               | 16,232 (26%) | 1,731 (40%) |      | 16,232 (26%) | 1,731 (32%) |      | 949,384 (27%)   | 1,144,430 (32%) |      |
| Unvaccinated                          | 16,247 (24%) | 289 (6.4%)  |      | 16,247 (24%) | 289 (19%)   |      | 806,138 (23%)   | 667,483 (19%)   |      |

KPNC = Kaiser Permanente Northern California; SMD = standardized mean difference

Sampling weights were calculated as the inverse of the probability of selection in a given age and race strata. We adjusted for non-response bias by calculating a response weight defined as the inverse of the probability of having completed the baseline serology exam and survey. This probability was calculated using the “SuperLearner” package for the R programming language. SuperLearner evaluates several candidate algorithms for model fitting and creates a weighted ensemble model from these candidate algorithms. The algorithms considered in our weighting process were: lasso regression, logistic regression, Pearson’s correlation coefficient, generalized additive models, random forest, gradient boosted decision trees, and a simple mean as a baseline. Each algorithm was fitted with the complete covariate set as well as reduced covariate sets determined by screeners for relationships with the outcome, specifically the univariate Pearson correlation, LASSO regression, and random forest variable importance measures.

The variables used in non-response weighting were race/ethnicity, gender, KPNC service region, age group, Charlson comorbidity score category, binary ever received a COVID-19 vaccine, recruitment wave, body mass index category, baseline immunity status, and multi-level vaccination status. Non-response weights were normalized to the size of the eligible sampled population and trimmed such that the maximum trimmed weight was the 99th percentile of the untrimmed weights. The final weight used in the analysis was the product of the sampling weight and the non-response weight.

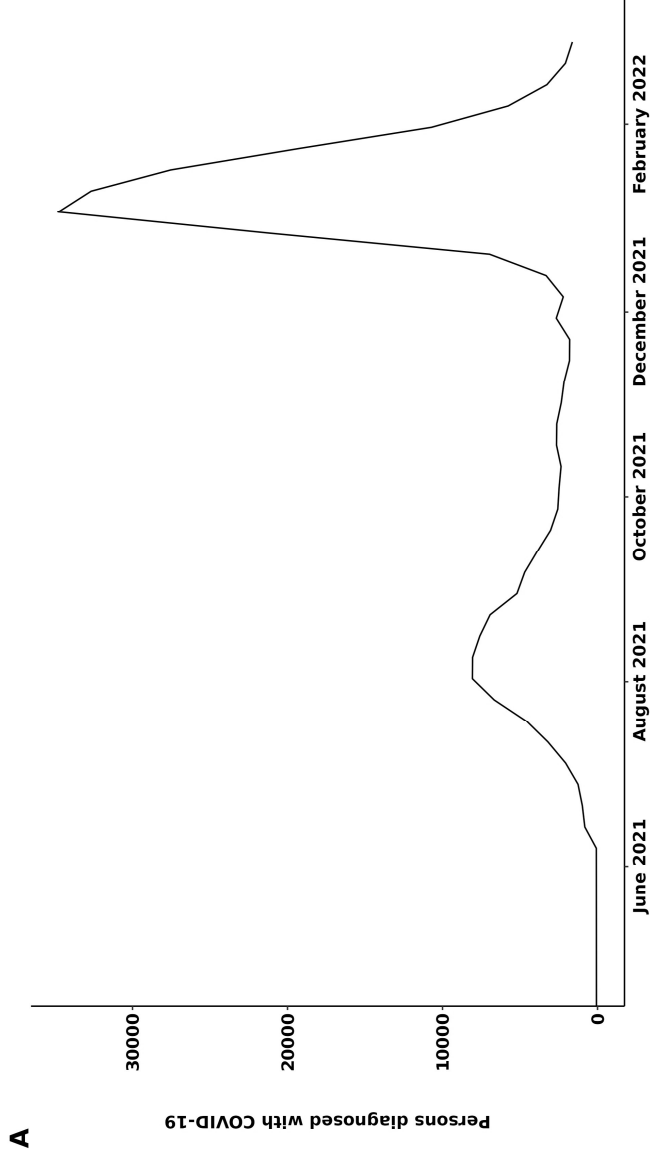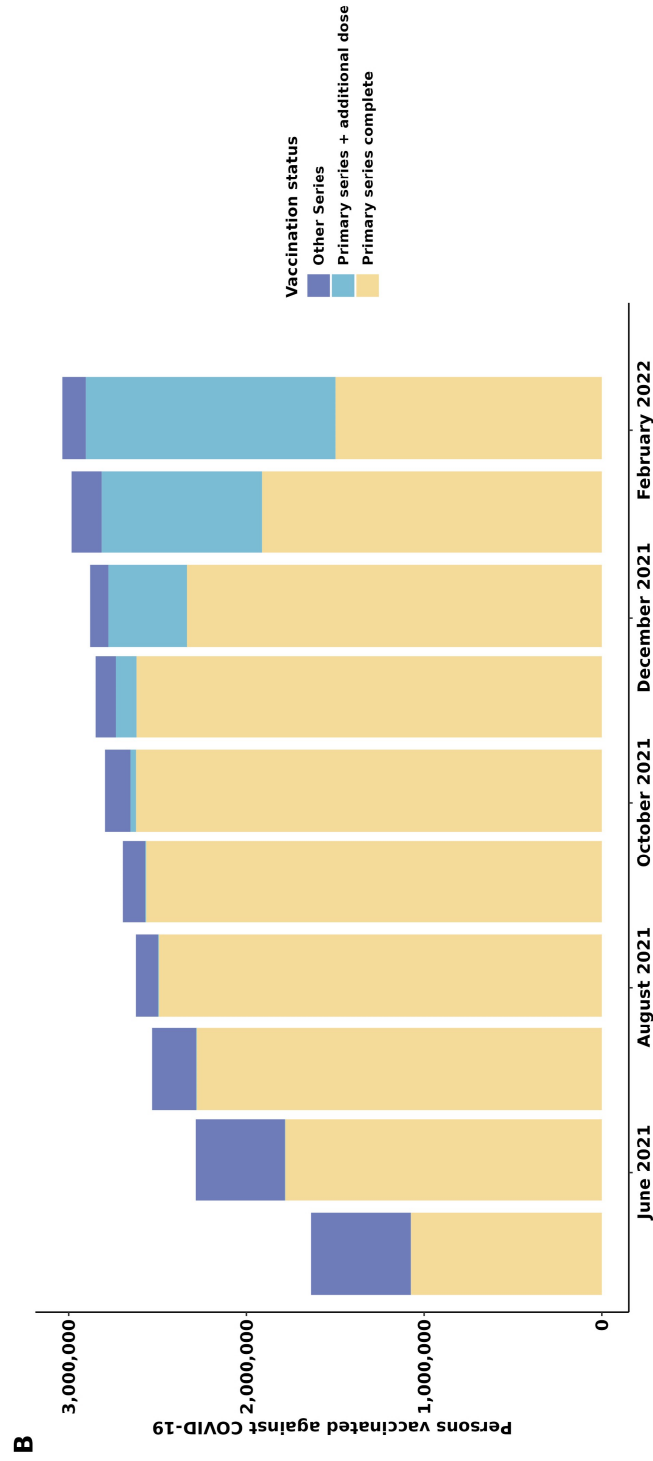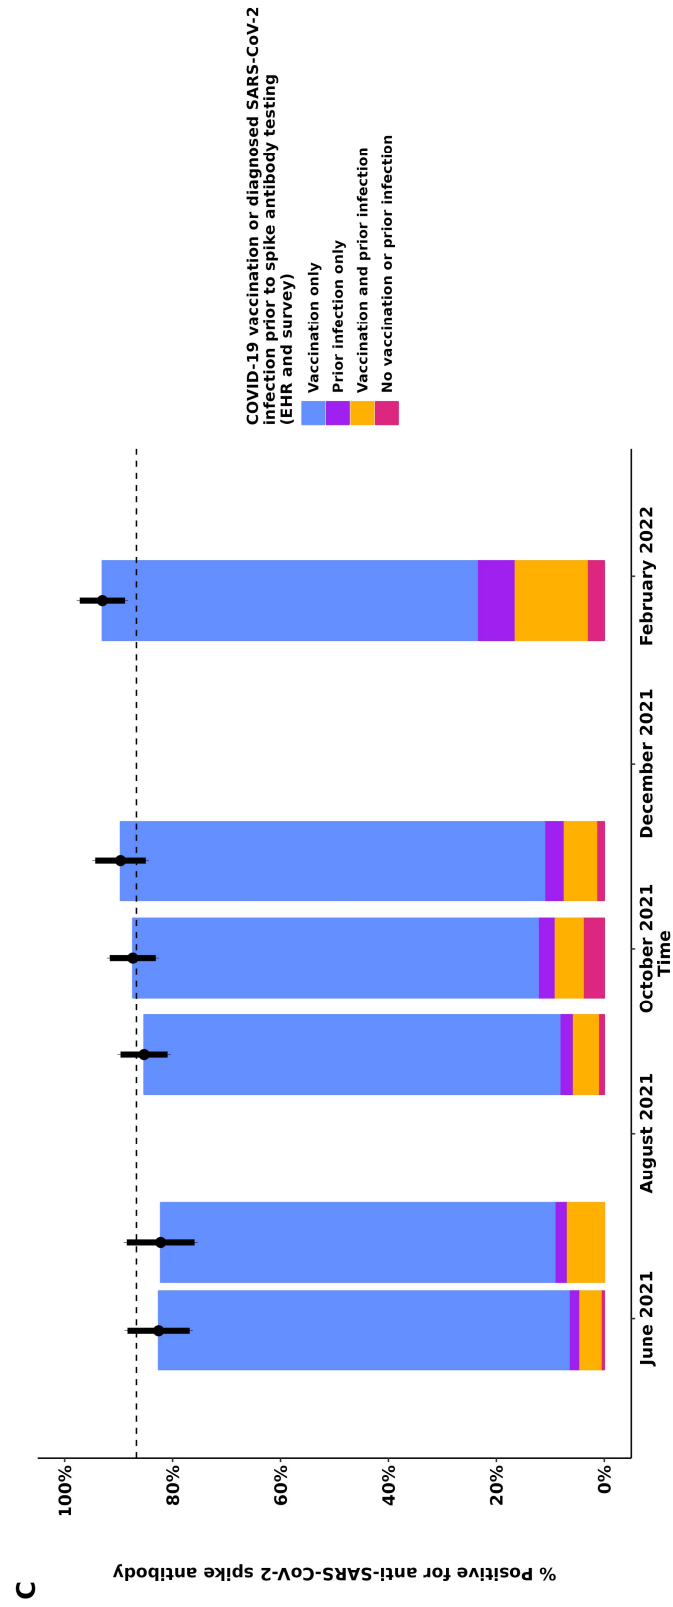

Source: https://www.medrxiv.org/content/10.1101/2024.01.31.24301674v1.full.pdf
